# Supplementary material for: Electrically bistable and non-volatile memory devices based on p-toluenesulfonic-doped poly(triphenylamine)
Source: Royal Society of Chemistry journal article supplement (doi:10.1039/c6ra01410k), 2016-01-01
Supplement: c6ra01410k1.pdf [file c6ra01410k1.pdf]

## Electronic Supplementary Information

### Electrically bistable and non-volatile memory devices based on *p*-toluenesulfonic doped poly(triphenylamine)

Decai Ren,<sup>ab</sup> Hongling Li<sup>a</sup>, Yu Zhu<sup>a</sup> and Xuduo Bai<sup>a\*</sup>

a.Key Laboratory of Functional Inorganic Material Chemistry, Ministry of Education,  
School of Chemistry Engineering and Materials Science, Heilongjiang University,  
Harbin 150080, P. R. China

b.Heilongjiang East University, Harbin 150066, P. R. China

Tel: +86 451 86608131; E-mail: 76949956@qq.com

#### List of Contents for Supplementary Material:

---

|                                                                                                    |             |
|----------------------------------------------------------------------------------------------------|-------------|
| <b>Fig. S1</b> <sup>1</sup> H NMR spectrum of PTPA-1 .....                                         | <u>SI-2</u> |
| <b>Fig. S2</b> DSC traces of PTPA with a heating rate of 20 °C min <sup>-1</sup> in nitrogen ..... | <u>SI-3</u> |
| <b>Fig. S3</b> UV-vis absorption spectra of PTPA films .....                                       | <u>SI-4</u> |
| <b>Fig. S4</b> CV diagrams of (a) PTPA-1-TsOH and (b) PTPA-2-TsOH film .....                       | <u>SI-5</u> |
| <b>Fig. S5</b> <i>I-V</i> results of (a) pristine PTPA-1 and (b) PTPA-2 .....                      | <u>SI-6</u> |

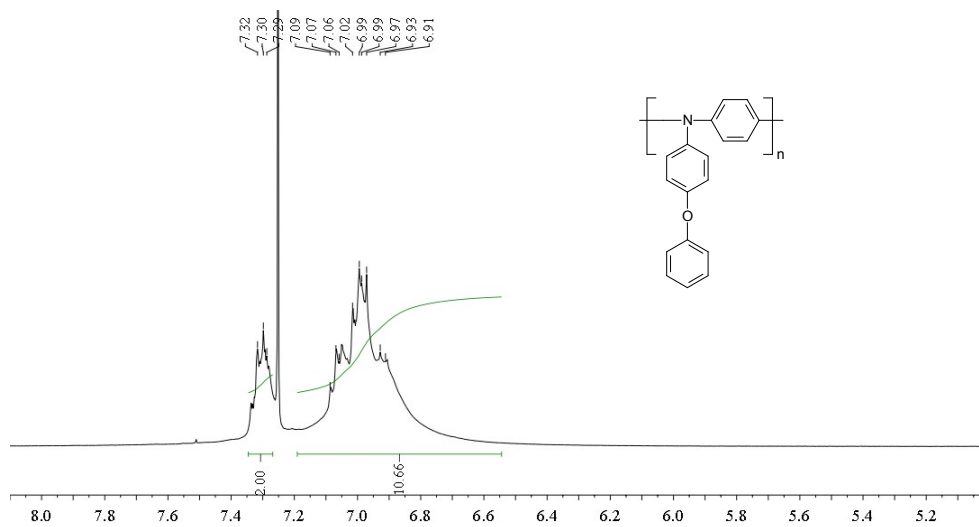

**Fig. S1**  $^1\text{H}$  NMR spectrum of PTPA-1

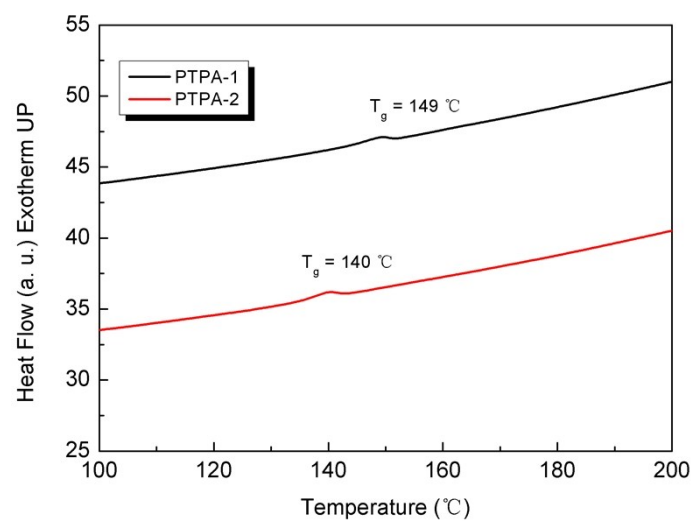

**Fig. S2** DSC traces of PTPA with a heating rate of 20 °C min<sup>-1</sup> in nitrogen

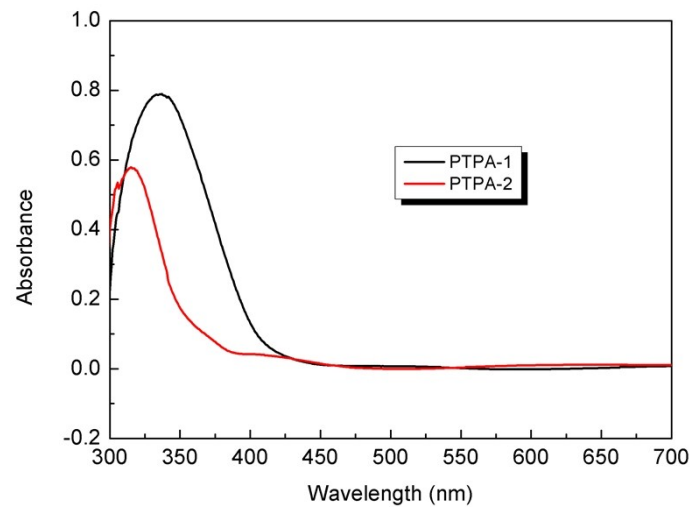

**Fig. S3** UV-vis absorption spectra of PTPA films

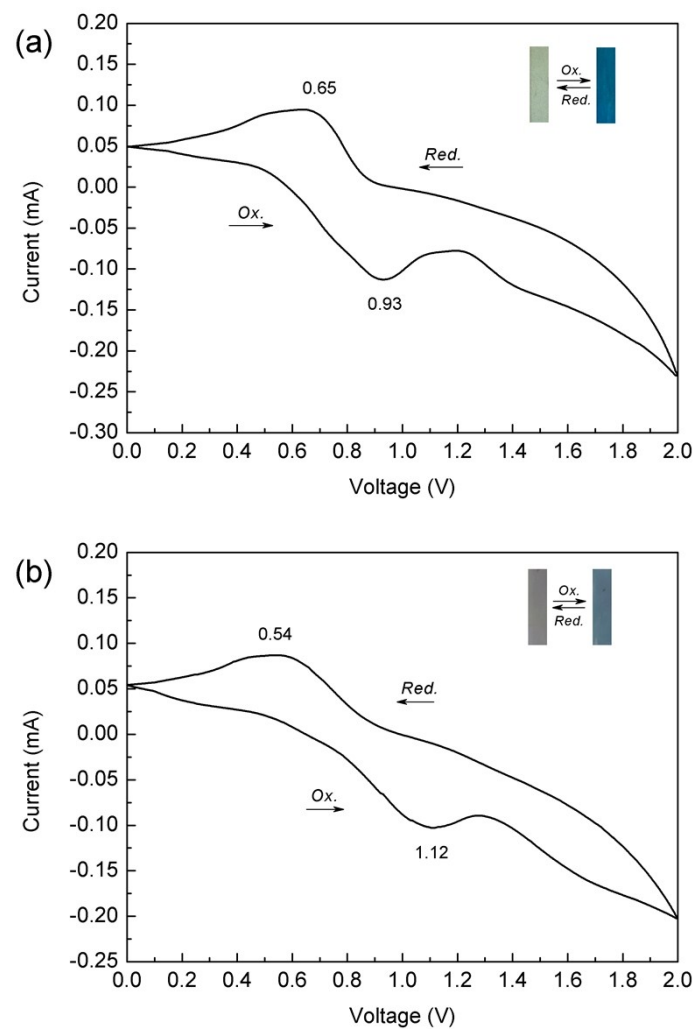

**Fig. S4** CV diagrams of (a) PTPA-1-TsOH and (b) PTPA-2-TsOH film

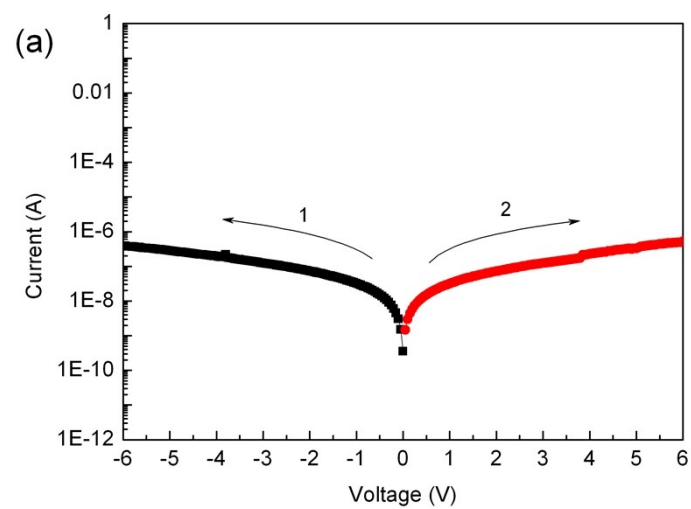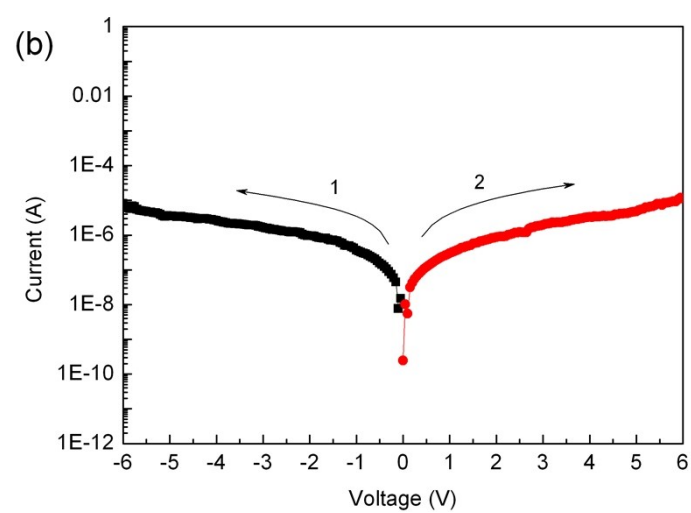

**Fig. S5**  $I$ - $V$  results of (a) pristine PTPA-1 and (b) PTPA-2
